# Supplementary material
Source: PubMed Central journal article supplement (PMC3346485)
Supplement: supp_78.9.3136_AEM-AEM07800-11-s01.pdf [file supp_78.9.3136_AEM-AEM07800-11-s01.pdf]

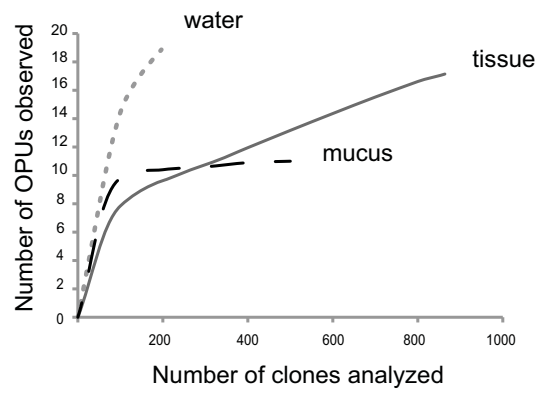

**Supplementary Figure 1:** Rarefaction analysis of nifH deduced protein sequences from coral tissue, coral mucus (pooled for all three corals species) and seawater samples. OPUs were defined using a 0.1 cutoff (90% similarity)
