# Supplementary material
Source: PubMed Central journal article supplement (PMC3346485)
Supplement: supp_78.9.3136_AEM-AEM07800-11-s02.pdf [file supp_78.9.3136_AEM-AEM07800-11-s02.pdf]

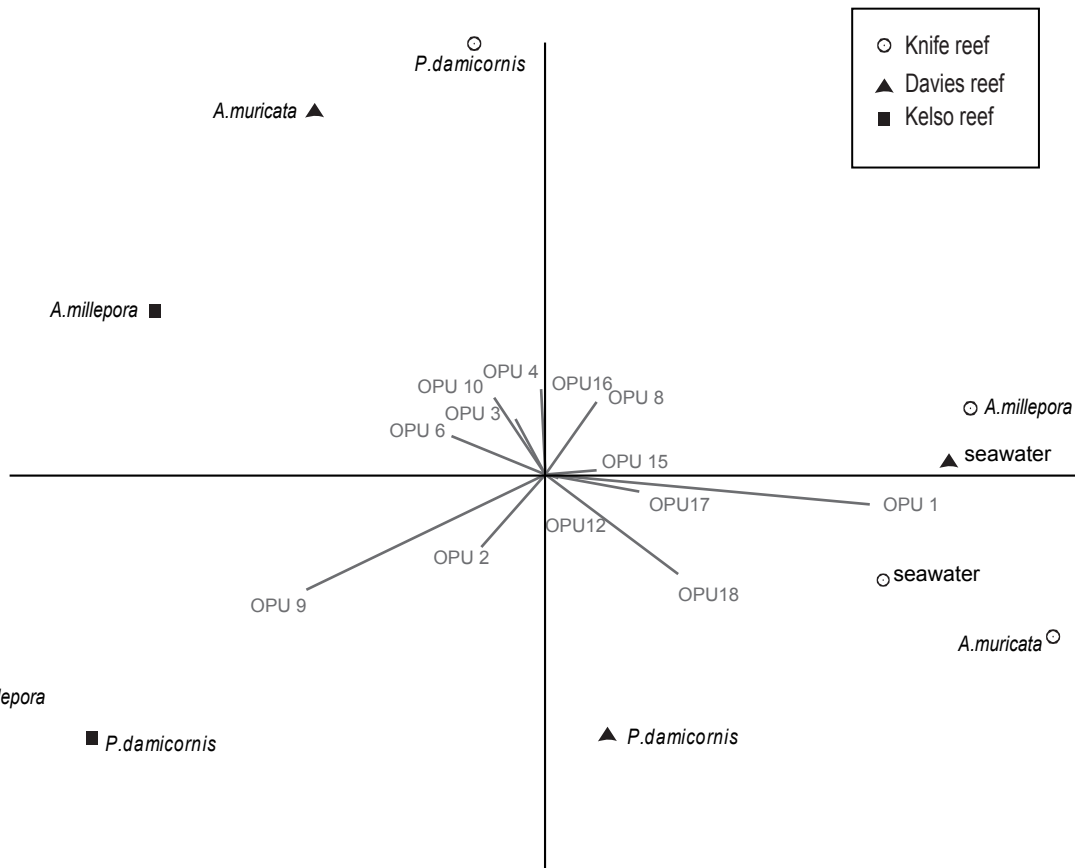

**Supplementary Figure 2:** PCA biplot representing relative abundances of *nifH* gene sequences derived from coral mucus clone libraries of three coral species sampled from 3 mid-shelf reefs (legend on graph); and seawater. Grey lines show vectors from representative OPUs that drive differences among the clone libraries. The corresponding taxonomic affiliation and Genbank accession numbers of OPUs can be found in figure 2 and table 2. For this analysis, only OPUs with more than 5 sequences are represented.
